# Supplementary material for: Financial Inclusion and Multidimensional Poverty Alleviation: The Moderating Role of Governance Efficiency in Asian Countries
Source: Research Square preprint supplement (doi:10.21203/rs.3.rs-6943904/v1), 2025-09-08
Supplement: Supplementary file 1 [file 6625e925280a8aee14f42eee.docx]

**Appendix**

| **Table 1 Cross-Sectional Dependence (CSD), Heteroscedasticity, and Serial Correlation (AR1) Tests** | | | | | |
| --- | --- | --- | --- | --- | --- |
| **Variable** | **CD** | **CDw** | **CDw+** | **CD*** | **CSD** |
| MPAI | 41.71*** | -1.94* | 573.04*** | -1.98** | Yes (Strong) |
| ATM | 20.75*** | 1.86* | 421.29*** | 3.52*** | Yes (Strong) |
| BB | 3.55*** | -0.71 | 383.53*** | -0.53 | Yes (Strong) |
| NIC | 4.08*** | -1.68 | 408.22*** | 0.68 | Yes (Strong) |
| BCPS | 12.39*** | -0.29 | 329.87*** | -0.94 | Yes (Strong) |
| ODCB | 22.15*** | -0.12 | 410.08*** | -0.34 | Yes (Strong) |
| OLCB | 11.09*** | -1.54 | 351.80*** | 0.85 | Yes (Strong) |
| RIF | -0.51 | -1.16 | 266.99*** | 0.35 | No (Weak) |
| MCS | 14.31*** | -1.87* | 364.23*** | -1.54 | Yes (Strong) |
| IUI | 42.02*** | -1.54 | 576.26*** | 1.22 | Yes (Strong) |
| FTS | 16.57*** | -1.99** | 407.71*** | 4.14*** | Yes (Strong) |
| FBS | 38.68*** | -1.35 | 529.58*** | 2.98*** | Yes (Strong) |
| NDC | 19.26*** | -2.23** | 526.56*** | 0.18 | Yes (Strong) |
| NCC | 11.69*** | -1.53 | 300.34*** | -0.90 | Yes (Strong) |
| GDPPC | 30.54*** | -1.74 | 525.23*** | -2.07** | Yes (Strong) |
| GGCE | 7.42*** | -0.13 | 253.61*** | 0.69 | Yes (Strong) |
| TO | 9.90*** | -1.57 | 368.36*** | -1.86* | Yes (Strong) |
| FDI | 3.29*** | 0.15 | 141.50*** | -1.57 | Yes (Strong) |
| TFII | 13.44*** | -1.95* | 368.27*** | -1.56 | Yes (Strong) |
| DIFI | 36.27*** | -1.45 | 523.83*** | 1.16 | Yes (Strong) |
| GEI | 18.05*** | -2.01** | 336.25*** | -0.95 | Yes (Strong) |
| **Test** | **Statistic** | **p-value** | **Null Hypothesis (H₀)** | **Decision** | |
| ZCD, CDw, CDw + 1 | See table | See table | Weak cross-sectional dependence | Reject Ho 1% and 5%, significance level. Evidence of CSD | |
| Breusch–Pagan/Cook–Weisberg Test | χ2(1)=5.29 | 0.0214 | Constant variance (Homoscedasticity) | Reject H₀ at 5% significance level. Evidence of heteroscedasticity. | |
| Wooldridge test (AR1) | F( 1, 19) = 34.445 | 0.0000 | No first-order autocorrelation | Rejects Ho at 1% significance level. Evidence of first-order autocorrelation | |
| **Note:** *: 10% significance level, **: 5% significance level, ***: 1% significance level. CD: Pesaran (2015, 2021), CDw: Juodis, Reese (2021), CDw+: Power-enhanced CDw from Fan et al. (2015), CD*: Pesaran, Xie (2021) with 4 PCs (Principal Components), CSD: Cross-Sectional Dependence. | | | | | |

| **Table 2 Descriptive Statistics** | | | | | |
| --- | --- | --- | --- | --- | --- |
| **Variable** | **Observation** | **Mean** | **Standard Deviation** | **Minimum** | **Maximum** |
| MPAI | 240 | 0.36 | 0.18 | -0.08 | 0.69 |
| ATM | 240 | 67.66 | 62.22 | 2.11 | 288.59 |
| BB | 240 | 17.68 | 14.22 | 2.81 | 71.92 |
| NIC | 240 | 0.21 | 0.20 | 0.01 | 0.10 |
| BCPS | 240 | 66.92 | 40.21 | 13.81 | 182.87 |
| ODCB | 240 | 62.70 | 37.24 | 12.83 | 168.49 |
| OLCB | 240 | 61.16 | 36.88 | 7.51 | 227.15 |
| RIF | 240 | 4.76 | 6.37 | 0.03 | 27.62 |
| MCS | 240 | 116.11 | 30.61 | 33.86 | 181.77 |
| IUI | 240 | 51.19 | 27.88 | 1.26 | 100.00 |
| FTS | 240 | 15.66 | 14.69 | 0.17 | 60.70 |
| FBS | 240 | 11.99 | 11.00 | 0.15 | 44.25 |
| NDC | 240 | 1297.40 | 1273.01 | 48.58 | 7264.21 |
| NCC | 240 | 421.28 | 725.70 | -15.54 | 2904.89 |
| GDPPC | 240 | 10375.28 | 14117.27 | 226.06 | 67638.65 |
| GEX | 240 | 15.02 | 12.66 | 4.81 | 103.16 |
| TO | 240 | 85.96 | 67.50 | 24.70 | 379.10 |
| FDI | 240 | 3.47 | 5.79 | -37.17 | 43.91 |
| GEI | 240 | -0.72 | 1.15 | -2.50 | 2.50 |
| **Source:** This Table is sourced from the WDI, GFD, WGI, GDL, and FAS. | | | | | |

| **Table 2 Correlation matrix and VIF** | | | | | | | | | | | | | | | | | | | |
| --- | --- | --- | --- | --- | --- | --- | --- | --- | --- | --- | --- | --- | --- | --- | --- | --- | --- | --- | --- |
| Variables | 1 | 2 | 3 | 4 | 5 | 6 | 7 | 8 | 9 | 10 | 11 | 12 | 13 | 14 | 15 | 16 | 17 | 18 | 19 |
| MPAI | 1 |  |  |  |  |  |  |  |  |  |  |  |  |  |  |  |  |  |  |
| ATM | 0.74  *** | 1 |  |  |  |  |  |  |  |  |  |  |  |  |  |  |  |  |  |
| BB | 0.17  *** | 0.23  *** | 1 |  |  |  |  |  |  |  |  |  |  |  |  |  |  |  |  |
| NIC | 0.08 | -0.01 | 0.71  *** | 1 |  |  |  |  |  |  |  |  |  |  |  |  |  |  |  |
| CBCPS | 0.44  *** | 0.5  *** | -0.04 | -0.2  *** | 1 |  |  |  |  |  |  |  |  |  |  |  |  |  |  |
| DODCB | 0.34  *** | 0.17  *** | -0.1 | -0.29  *** | 0.81  *** | 1 |  |  |  |  |  |  |  |  |  |  |  |  |  |
| POLCB | 0.45  *** | 0.22  *** | -0.03 | -0.14  ** | 0.51  *** | 0.59  *** | 1 |  |  |  |  |  |  |  |  |  |  |  |  |
| RIF | -0.46  *** | -0.4  *** | -0.02 | 0.2  *** | -0.2  *** | -0.13  *** | -0.23  *** | 1 |  |  |  |  |  |  |  |  |  |  |  |
| MCS | 0.49  *** | 0.42  *** | 0.19  *** | 0.24  *** | 0.2  *** | 0.05 | 0.15  *** | -0.22  *** | 1 |  |  |  |  |  |  |  |  |  |  |
| IIUI | 0.86  *** | 0.64  *** | 0.06 | 0.05 | 0.4  *** | 0.3  *** | 0.48  *** | -0.38  *** | 0.5  *** | 1 |  |  |  |  |  |  |  |  |  |
| FTS | 0.77  *** | 0.8  *** | 0.21  *** | 0.01 | 0.38  *** | 0.23  *** | 0.29  *** | -0.36  *** | 0.31  *** | 0.64  *** | 1 |  |  |  |  |  |  |  |  |
| FBS | 0.79  *** | 0.82  *** | 0.15  *** | -0.04 | 0.52  *** | 0.33  *** | 0.43  *** | -0.39  *** | 0.35  *** | 0.79  *** | 0.81  *** | 1 |  |  |  |  |  |  |  |
| DNDC | 0.51  *** | 0.33  *** | 0.31  *** | 0.02 | 0.5  *** | 0.55  *** | 0.41  *** | -0.38  *** | 0.22  *** | 0.44  *** | 0.42  *** | 0.6  *** | 1 |  |  |  |  |  |  |
| NCC | 0.69  *** | 0.76  *** | 0.15  *** | -0.21  *** | 0.52  *** | 0.41  *** | 0.35  *** | -0.35  *** | 0.14  ** | 0.55  *** | 0.85  *** | 0.78  *** | 0.44  *** | 1 |  |  |  |  |  |
| DGDPPC | 0.58  *** | 0.51  *** | 0.03  *** | -0.14  ** | 0.19  *** | 0.22  *** | 0.63  *** | -0.4  *** | 0.37  *** | 0.59  *** | 0.59  *** | 0.64  *** | 0.28  *** | 0.49  *** | 1 |  |  |  |  |
| GGCE | 0.24  *** | 0.32  *** | 0.06 | 0.04 | 0.32  *** | 0.18  *** | -0.21  *** | -0.17  *** | 0.28  *** | 0.1 | 0.1 | 0.14  ** | 0.12  * | 0.11  * | -0.01 | 1 |  |  |  |
| TO | 0.1  ** | 0.04 | -0.04 | 0.18  *** | -0.03 | -0.05 | 0.51  *** | -0.17  *** | 0.36  *** | 0.22  *** | 0.03 | 0.09 | -0.11  * | -0.14  ** | 0.62  *** | -0.01 | 1 |  |  |
| DFDI | -0.24  *** | -0.19  *** | 0.42  *** | 0.58  *** | -0.11  * | -0.18  *** | -0.11  * | 0.02 | 0.1 | -0.19  *** | -0.1  *** | -0.2  *** | -0.004 | -0.2  *** | -0.2  *** | -0.09 | 0.1  ** | 1 |  |
| QGI | 0.71  *** | 0.59  *** | 0.32  *** | 0.09 | 0.52  *** | 0.49  *** | 0.46  *** | -0.25  *** | 0.3  *** | 0.58  *** | 0.74  *** | 0.65  *** | 0.48  *** | 0.78  *** | 0.48  *** | 0.15  *** | 0.1 | -0.1 | 1 |
| VIF |  | 11 | 5.1 | 6.7 | 12 | 11 | 6.5 | 1.9 | 2.1 | 4.6 | 7.7 | 13 | 4.4 | 11 | 13 | 2.2 | 8.9 | 2.3 | 5 |
| 1/VIF |  | 0.1 | 0.2 | 0.2 | 0.1 | 0.1 | 0.2 | 0.5 | 0.5 | 0.2 | 0.1 | 0.1 | 0.2 | 0.1 | 0.1 | 0.5 | 0.1 | 0.4 | 0 |
| Note: Note: In the table, *, **, and *** denote significance at 10%, 5%, 1% levels, respectively. Standard errors are in parentheses (). | | | | | | | | | | | | | | | | | | | |
